# Supplementary material
Source: PubMed Central journal article supplement (PMC10011925)
Supplement: sj-pdf-1-tva-10.1177_15248380211038690.pdf [file sj-pdf-1-tva-10.1177_15248380211038690.pdf]

eTable 1: Newcastle Ottawa Scale for cross-sectional studies

TABLE 1. NEWCASTLE OTTAWA SCALE FOR CROSS-SECTIONAL STUDIES

| First author (year)    | Selection                                              |                                                              |                 |                                        | Comparability                                                                                                                                    | Outcome               |                                                                                                                                                           | Total |
|------------------------|--------------------------------------------------------|--------------------------------------------------------------|-----------------|----------------------------------------|--------------------------------------------------------------------------------------------------------------------------------------------------|-----------------------|-----------------------------------------------------------------------------------------------------------------------------------------------------------|-------|
|                        | Representativeness of the sample                       | Sample size                                                  | Non-respondents | Ascertainment of exposure              | The subjects in different outcome groups are comparable, based on the study design or analysis. Confounding factors are controlled.              | Assessment of outcome | Statistical test                                                                                                                                          |       |
| Huber (2020)           | *                                                      | *                                                            | -               | -                                      | *                                                                                                                                                | *                     | -                                                                                                                                                         | 04/10 |
|                        | Sos Hotlines                                           | People called to SOS helplines in 13 countries (no raw data) | No description  | No description of the measurement tool | location                                                                                                                                         | Self report           | No description                                                                                                                                            |       |
| Asiamah et al. (2021)  | *                                                      | *                                                            | *               | *                                      | **                                                                                                                                               | *                     | *                                                                                                                                                         | 8/10  |
|                        | Survey Monkey online platform                          | 643 (35% female; 65% male)                                   | 0%              | Non-validated but tool is described    | Sex, age, location (City 1,2,3), educational level, income, chronic disease status, physical activity, sendetary behaviour, changes in behaviour | Self report           | Descriptive statistics and multiple linear regression analysis, with a sensitivity analysis selecting potential covariates for the final regression model |       |
| Beland et al. (2020)   | *                                                      | *                                                            | -               | *                                      | **                                                                                                                                               | *                     | *                                                                                                                                                         | 7/10  |
|                        | Online survey "the Canadian Perspective Survey Series" | 7,242 (2,433 women of 4,627 respondents)                     | 2,615           | Non-validated but tool is described    | Age, marital status, Child under 18 present in dwelling, educational level                                                                       | Self report           | OLS regressions                                                                                                                                           |       |
| Biddle et al. (2020)   | *                                                      | *                                                            | -               | *                                      | **                                                                                                                                               | *                     | *                                                                                                                                                         | 7/10  |
|                        | online survey Life in Australia TM panel               | 2,984 in April and 3,249 in May                              | No description  | Non-validated but tool is described    | Age, sex, Indigenous/born overseas in English/non-English speaking countries, educational level, living in disadvantaged/advantaged areas        | Self report           | Regression analysis                                                                                                                                       |       |
| Sanga & McCrary (2020) | *                                                      | *                                                            | -               | -                                      | -                                                                                                                                                | *                     | *                                                                                                                                                         | 4/10  |

|                          |                                                                                               |                                |                |                                        |                                                                                                                                                                                                                                                                                                        |             |                                                                                                    |      |
|--------------------------|-----------------------------------------------------------------------------------------------|--------------------------------|----------------|----------------------------------------|--------------------------------------------------------------------------------------------------------------------------------------------------------------------------------------------------------------------------------------------------------------------------------------------------------|-------------|----------------------------------------------------------------------------------------------------|------|
|                          | USA 911 calls                                                                                 | Approximately 52.000.000 calls | No description | No description of the measurement tool | No description                                                                                                                                                                                                                                                                                         | Self report | Regression analysis                                                                                |      |
| Boserup et al. (2020)    | *                                                                                             | -                              | -              | -                                      | -                                                                                                                                                                                                                                                                                                      | *           | -                                                                                                  | 2/10 |
|                          | USA police department data                                                                    | No description                 | No description | No description of the measurement tool | No description                                                                                                                                                                                                                                                                                         | Self report | No description                                                                                     |      |
| Brown et al.(2020)       | *                                                                                             | *                              | -              | **                                     | **                                                                                                                                                                                                                                                                                                     | *           | *                                                                                                  | 8/10 |
|                          | families involved with service agencies and educational settings in the Rocky Mountain region | 216 (183 respondents)          | 33             | Validated measurement tool             | Parent age, gender, race/ ethnicity, education, relationship status, receipt of financial assistance, and number of adults and children in the household.                                                                                                                                              | Self report | ANOVA & regression analysis                                                                        |      |
| Davis et al. (2020)      | *                                                                                             | *                              | -              | **                                     | *                                                                                                                                                                                                                                                                                                      | *           | *                                                                                                  | 7/10 |
|                          | Participants recruited via a survey company                                                   | 2,045                          | No description | Validated measurement tool             | Gender and age                                                                                                                                                                                                                                                                                         | Self report | Spearman nonparametric correlation analyses, four binary logistic regressions, univariate analysis |      |
| Frank et al. (2020)      | *                                                                                             | *                              | -              | *                                      | **                                                                                                                                                                                                                                                                                                     | *           | *                                                                                                  | 7/10 |
|                          | Vulnerable individuals in the UK, recruited via the COVID-19 Social Study                     | 51,417 (female 51.1%)          | No description | Non-validated but tool is described    | Age, sex,non-white ethnic background, low socio-economic position (SEP), type of work suspected COVID-19 diagnosis,health-related and psychosocial vulnerabilities included pre-existing physical and mental health conditions, experience of psychological and/or physical abuse, low social support, | Self report | Mixture modelling and multivariate logistic regression models                                      |      |
| Foster & Fletcher (2020) | *                                                                                             | *                              | -              | *                                      | -                                                                                                                                                                                                                                                                                                      | *           | -                                                                                                  | 4/10 |
|                          | Frontline workers and service providers in metropolitan,                                      | 80                             | No description | Non-validated but tool is described    | No description                                                                                                                                                                                                                                                                                         | Self report | No description                                                                                     |      |

|                      |                                                                                                                                                                                                                                                                                                                                                                                                                                                                     |                |                |                                        |                                                                                                                                                                                                                                                                                                                  |                      |                        |      |
|----------------------|---------------------------------------------------------------------------------------------------------------------------------------------------------------------------------------------------------------------------------------------------------------------------------------------------------------------------------------------------------------------------------------------------------------------------------------------------------------------|----------------|----------------|----------------------------------------|------------------------------------------------------------------------------------------------------------------------------------------------------------------------------------------------------------------------------------------------------------------------------------------------------------------|----------------------|------------------------|------|
|                      | regional and rural locations right across NSW, including WDV CAS workers, Aboriginal Specialist Workers, Multicultural Specialist Workers, Safety Action Meeting Coordinators, Court Advocates, Information and Referral Officers, Family Advocacy Support Service workers, case workers, Staying Home Leaving Violence workers, counsellors, women's refuge and accommodation support workers, women's health centre workers, outreach workers, Managers and CEOs. |                |                |                                        |                                                                                                                                                                                                                                                                                                                  |                      |                        |      |
| Iob et al. (2020)    | *                                                                                                                                                                                                                                                                                                                                                                                                                                                                   | *              | -              | *                                      | **                                                                                                                                                                                                                                                                                                               | *                    | -                      | 6/10 |
|                      | COVID-19 Social Study                                                                                                                                                                                                                                                                                                                                                                                                                                               | 44,775         | No description | Non-validated but tool is described    | Gender, age, ethnicity, marital status, children in the household, employment status, educational attainment, income overcrowding, mental health diagnosis, chronic physical illness, COVID-19 diagnosis, depressive symptoms, anxiety symptoms, self harm thoughts, self harm behaviours, mental health support | Self report          | Descriptive statistics |      |
| Jung et al. (2020)   | *                                                                                                                                                                                                                                                                                                                                                                                                                                                                   | *              | -              | *                                      |                                                                                                                                                                                                                                                                                                                  | *                    | -                      | 4/10 |
|                      | Online Survey                                                                                                                                                                                                                                                                                                                                                                                                                                                       | 3,545          | No description | non-validated but tool is described    | No description                                                                                                                                                                                                                                                                                                   | Self report          | Descriptive statistics |      |
| Knipe et al. (2020)  | *                                                                                                                                                                                                                                                                                                                                                                                                                                                                   | -              | -              | -                                      |                                                                                                                                                                                                                                                                                                                  | *                    | *                      | 3/10 |
|                      | Google search trends                                                                                                                                                                                                                                                                                                                                                                                                                                                | No description | No description | No description of the measurement tool | No description                                                                                                                                                                                                                                                                                                   | Google search trends | Correlation analysis   |      |
| Mohler et al. (2020) | *                                                                                                                                                                                                                                                                                                                                                                                                                                                                   | -              | -              | -                                      | -                                                                                                                                                                                                                                                                                                                | *                    | *                      | 3/10 |

|                                 | Police calls and reports                                                                 | No description                                            | No description               | No description of the measurement tool | Date                                                                                           | Self report | Regression analysis                              |      |
|---------------------------------|------------------------------------------------------------------------------------------|-----------------------------------------------------------|------------------------------|----------------------------------------|------------------------------------------------------------------------------------------------|-------------|--------------------------------------------------|------|
| Armbruster & Klotzbücher (2020) | *                                                                                        | *                                                         | -                            | -                                      | **                                                                                             | *           | *                                                | 6/10 |
|                                 | German Adults, data from online and telephone counseling hotline, the "TelefonSeelsorge" | 715,227 (female 68.3%; male 31.5%; other 0.2% of 697,929) | No description               | No description of the measurement tool | Sex, age, location, employment state, psychiatric diagnosis (if applicable), living with other | Self report | Kernel-weighted local polynomial regression      |      |
| Brühlhart & Lalive (2020)       | *                                                                                        | *                                                         | -                            | -                                      | *                                                                                              | *           | *                                                | 5/10 |
|                                 | People calling in Helplines in Switzerland (mainly German-Speaking)                      | 63,639 (for 2019 and 2020)                                | No description               | No description of the measurement tool | Gender and age                                                                                 | Self report | Regression Analysis                              |      |
| Halford et al. (2020)           | *                                                                                        | *                                                         | -                            | -                                      | -                                                                                              | *           | *                                                | 4/10 |
|                                 | UK crimes                                                                                | Drawn from the same community as the exposed cohort       | Police records (self report) | No description of the measurement tool | No description                                                                                 | Self report | Statistical test is clearly described            |      |
| Leslie & Wilson (2020)          | *                                                                                        | -                                                         | -                            | -                                      | -                                                                                              | *           | *                                                | 3/10 |
|                                 | Police Reports in the UK                                                                 | No description                                            | No description               | No description of the measurement tool | No description                                                                                 | Self report | Diference-in-diferences and event study methods. |      |
| Baron et al. (2020)             | *                                                                                        | *                                                         | -                            | -                                      | -                                                                                              | *           | *                                                | 4/10 |
|                                 | Child Abuse Hotline reports                                                              | 13,132 by month observations                              | No description               | No description of the measurement tool | No description                                                                                 | Self report | Regression Analysis                              |      |
| McLay (2021)                    | *                                                                                        | *                                                         | -                            | -                                      | -                                                                                              | *           | *                                                | 4/10 |
|                                 | Police Reports in The USA                                                                | 4,618                                                     | Police records (self report) | No description of the measurement tool | No description                                                                                 | Self report | Logistic regression analysis                     |      |
| Nduna & Oyama                   | -                                                                                        | -                                                         | -                            | -                                      | *                                                                                              | *           | -                                                | 2/10 |

|                            |                                         |                   |                            |                                     |                                                              |             |                                                         |      |
|----------------------------|-----------------------------------------|-------------------|----------------------------|-------------------------------------|--------------------------------------------------------------|-------------|---------------------------------------------------------|------|
| (2020)                     |                                         |                   |                            |                                     |                                                              |             |                                                         |      |
|                            | Selected group of users                 | Not justified     | No description             | No description                      | Gender-based violence                                        | Self report | No description                                          |      |
| Nguyen et al (2020)        | *                                       | -                 | -                          | -                                   | *                                                            | *           | -                                                       | 3/10 |
|                            | Women, men, boys and girls in Australia | Not justified     | No description             | No description                      | Sex and age                                                  | Self report | No description                                          |      |
| Pfitzner et al. (2020)     | -                                       | *                 | -                          | *                                   | **                                                           | *           | *                                                       | 6/10 |
|                            | Selected group of users                 | 166 practitioners | No description             | Non-validated but tool is described | Sector and local area                                        | Self report | Univariate analyses                                     |      |
| Piquero (2020)             | -                                       | -                 | -                          | -                                   | **                                                           | *           | *                                                       | 4/10 |
|                            | No description                          | Not justified     | No description             | Police data                         | Stay-at-home and domestic violence                           | Self report | Dickey-Fuller test, multiple OLS and Poisson regression |      |
| Roca et al. (2020)         | -                                       | *                 | -                          | *                                   | **                                                           | *           | *                                                       | 6/10 |
|                            | Selected group of users                 | 10 school staff   | No description             | Non-validated but tool is described | Gender, age, years in school, school                         | Self report | Dialogic Recreation of Knowledge (DRK)                  |      |
| Stiegler & Bouchard (2020) | -                                       | *                 | *                          | *                                   | **                                                           | *           | -                                                       | 6/10 |
|                            | Selected group of users                 | 32                | Original 40 (32 responded) | Non-validated but tool is described | Social background, residential settings, marital status, age | Self report | No description                                          |      |

eTable 1: Newcastle Ottawa Scale for cohort studies

| First author (year) | Selection                                |                                     |                  |                                            | Comparability                                       | Outcome               |                                                 |                                  | Total |
|---------------------|------------------------------------------|-------------------------------------|------------------|--------------------------------------------|-----------------------------------------------------|-----------------------|-------------------------------------------------|----------------------------------|-------|
|                     | Representativeness of the exposed cohort | Selection of the non-exposed cohort | Ascertainment of | Demonstration that outcome of interest was | Comparability of cohorts on the basis of the design | Assessment of outcome | Was follow-up long enough for outcomes to occur | Adequacy of follow-up of cohorts |       |

|                                               |                                           |                           | exposure                             | not present at start of study | or analysis controlled for confounders                                                                              |                |     |                    |              |
|-----------------------------------------------|-------------------------------------------|---------------------------|--------------------------------------|-------------------------------|---------------------------------------------------------------------------------------------------------------------|----------------|-----|--------------------|--------------|
| Sibley et al. (2020)                          | *                                         | *                         | *                                    | *                             | **                                                                                                                  | -              | *   | *                  | Good quality |
|                                               | New Zealand citizens                      | Propensity score matching | New Zealand electoral roll           | yes                           | Ethnicity, gender, age, education, socioeconomic status, disability status, place of birth, New Zealand citizenship | Self report    | yes | Complete follow up |              |
| Sidpra et al. (2020)                          | **                                        | *                         | *                                    | -                             | **                                                                                                                  | *              | *   | -                  | Good quality |
|                                               | Children submitted to hospital            | From the same records     | Medical records                      | No                            | Medical condition, parental vulnerabilities                                                                         | Record linkage | yes | No statement       |              |
| Silverio-Murillo & Balmori de la Miyar (2020) | **                                        | *                         | *                                    | *                             | **                                                                                                                  | *              | *   | -                  | Good quality |
|                                               | Linea Mujeres call-center service records | Same records              | National Population Council (CONAPO) | yes                           | Domestic violence, psychological calls, legal calls, working, cohabiting                                            | Record linkage | yes | No statement       |              |
| Wright et al (2020a)                          | *                                         | *                         | -                                    | -                             | **                                                                                                                  | *              | *   | -                  | Good quality |
|                                               | UK adults                                 | Same records              | COVID-19 Social Study (self report)  | no                            | Socio-economic status, genetics, personality, history of mental illness                                             | Record linkage | yes | No statement       |              |
| Wright et al. (2020b)                         | *                                         | *                         | -                                    | -                             | **                                                                                                                  | *              | *   | -                  | Good quality |

|                    |                       |                       |                                         |     |                                                                                 |                |     |              |              |
|--------------------|-----------------------|-----------------------|-----------------------------------------|-----|---------------------------------------------------------------------------------|----------------|-----|--------------|--------------|
|                    | UK adults             | Same records          | COVID-19 Social Study (self report)     | yes | Gender, age, ethnicity, education                                               | Record linkage | yes | No statement |              |
| Payne et al (2020) | -                     | *                     | -                                       | *   | **                                                                              | *              | *   |              | Fair quality |
|                    | Queensland population | Queensland population | Queensland Government's Open Data Porta | yes | Common assault, serious assault, sexual offence, domestic violence order breach | Record linkage | yes | No statement |              |
